# Supplementary material for: Study on the agonists for the human Toll-like receptor-8 by molecular modeling
Source: Royal Society of Chemistry journal article supplement (doi:10.1039/c4mb00183d), 2014-04-28
Supplement: c4mb00183d1.pdf [file c4mb00183d1.pdf]

**Table S.1** The explanation of the BOND and NOSP attributes.

| =                             | # | @ | Comments                                                        |                                                                 |
|-------------------------------|---|---|-----------------------------------------------------------------|-----------------------------------------------------------------|
| Calculation of the BOND index |   |   |                                                                 |                                                                 |
| 0                             | 0 | 0 | There are no double, triple, or stereochemical bonds.           |                                                                 |
| 0                             | 0 | 1 | The molecule contains only stereochemical bonds.                |                                                                 |
| 0                             | 1 | 0 | The molecule contains only triple bonds.                        |                                                                 |
| 0                             | 1 | 1 | The molecule contains triple and stereochemical bonds.          |                                                                 |
| 1                             | 0 | 0 | The molecule contains only double bonds.                        |                                                                 |
| 1                             | 0 | 1 | The molecule contains double bonds and stereochemical bonds.    |                                                                 |
| 1                             | 1 | 0 | The molecule contains double and triple bonds.                  |                                                                 |
| 1                             | 1 | 1 | The molecule contains double, triple, and stereochemical bonds. |                                                                 |
| N                             | O | S | P                                                               | Comments                                                        |
| Calculation of the NOSP index |   |   |                                                                 |                                                                 |
| 0                             | 0 | 0 | 0                                                               | Nitrogen, oxygen, sulfur, and phosphorus are absent.            |
| 0                             | 0 | 0 | 1                                                               | The molecule contains only phosphorus.                          |
| 0                             | 0 | 1 | 0                                                               | The molecule contains only sulfur.                              |
| 0                             | 0 | 1 | 1                                                               | The molecule contains sulfur and phosphorus.                    |
| 0                             | 1 | 0 | 0                                                               | The molecule contains only oxygen.                              |
| 0                             | 1 | 0 | 1                                                               | The molecule contains oxygen and phosphorus.                    |
| 0                             | 1 | 1 | 0                                                               | The molecule contains oxygen and sulfur.                        |
| 0                             | 1 | 1 | 1                                                               | The molecule contains oxygen, sulfur, and phosphorus.           |
| 1                             | 0 | 0 | 0                                                               | The molecule contains only nitrogen.                            |
| 1                             | 0 | 0 | 1                                                               | The molecule contains nitrogen and phosphorus.                  |
| 1                             | 0 | 1 | 0                                                               | The molecule contains nitrogen and sulfur.                      |
| 1                             | 0 | 1 | 1                                                               | The molecule contains nitrogen, sulfur, and phosphorus.         |
| 1                             | 1 | 0 | 0                                                               | The molecule contains nitrogen and oxygen.                      |
| 1                             | 1 | 0 | 1                                                               | The molecule contains nitrogen, oxygen and phosphorus.          |
| 1                             | 1 | 1 | 0                                                               | The molecule contains nitrogen, oxygen, and sulfur.             |
| 1                             | 1 | 1 | 1                                                               | The molecule contains nitrogen, oxygen, sulfur, and phosphorus. |

**Table S.2** The methods and results in the SMILES-based models.

| Method       | Split1      | Training set n=41 |          |       |       | Test set n=14 |        |       |     |
|--------------|-------------|-------------------|----------|-------|-------|---------------|--------|-------|-----|
|              |             | $R^{2a}$          | $Q^{2b}$ | $S^c$ | $F^d$ | $R^2$         | $Q^2$  | $S$   | $F$ |
| $S_k, SS_k,$ | Run1(0, 7)  | 0.9320            | 0.9243   | 0.163 | 535   | 0.8262        | 0.7582 | 0.289 | 57  |
| $SSS_k,$     | Run2(2, 8)  | 0.9345            | 0.9272   | 0.160 | 556   | 0.8138        | 0.7488 | 0.295 | 52  |
| BOND,        | Run3(0, 6)  | 0.9116            | 0.9017   | 0.186 | 402   | 0.8413        | 0.7698 | 0.282 | 64  |
| NOSP         | Average     | 0.9274            | 0.9177   | 0.170 | 498   | 0.8271        | 0.7589 | 0.289 | 58  |
| Method       | Split2      | Training set n=41 |          |       |       | Test set n=14 |        |       |     |
|              |             | $R^2$             | $Q^2$    | $S$   | $F$   | $R^2$         | $Q^2$  | $S$   | $F$ |
| $S_k, SS_k,$ | Run1(4, 9)  | 0.9178            | 0.9094   | 0.180 | 436   | 0.7539        | 0.6811 | 0.353 | 37  |
| $SSS_k,$     | Run2(5, 9)  | 0.9136            | 0.9045   | 0.184 | 412   | 0.7141        | 0.6253 | 0.380 | 30  |
| BOND,        | Run3(4, 8)  | 0.9134            | 0.9041   | 0.185 | 411   | 0.7358        | 0.6528 | 0.355 | 33  |
| NOSP         | Average     | 0.9149            | 0.9060   | 0.183 | 420   | 0.7346        | 0.6530 | 0.363 | 33  |
| Method       | Split3      | Training set n=42 |          |       |       | Test set n=13 |        |       |     |
|              |             | $R^2$             | $Q^2$    | $S$   | $F$   | $R^2$         | $Q^2$  | $S$   | $F$ |
| $S_k, SS_k,$ | Run1(5, 17) | 0.8696            | 0.8559   | 0.233 | 267   | 0.8468        | 0.7969 | 0.292 | 61  |
| BOND,        | Run2(4, 19) | 0.8787            | 0.8659   | 0.225 | 290   | 0.7831        | 0.7194 | 0.368 | 40  |
| NOSP         | Run3(4, 19) | 0.8705            | 0.8568   | 0.232 | 269   | 0.7942        | 0.7401 | 0.322 | 42  |
|              | Average     | 0.8729            | 0.8595   | 0.230 | 275   | 0.8080        | 0.7521 | 0.327 | 48  |
| Method       | Split4      | Training set n=42 |          |       |       | Test set n=13 |        |       |     |
|              |             | $R^2$             | $Q^2$    | $S$   | $F$   | $R^2$         | $Q^2$  | $S$   | $F$ |
| $S_k,$       | Run1(4, 9)  | 0.8366            | 0.8213   | 0.261 | 205   | 0.7327        | 0.6297 | 0.348 | 30  |
| BOND,        | Run2(2, 8)  | 0.8139            | 0.7981   | 0.279 | 175   | 0.7474        | 0.6506 | 0.343 | 33  |
| NOSP         | Run3(2, 8)  | 0.8275            | 0.8121   | 0.268 | 192   | 0.7380        | 0.6400 | 0.347 | 31  |
|              | Average     | 0.8260            | 0.8105   | 0.269 | 191   | 0.7394        | 0.6401 | 0.346 | 31  |

<sup>a</sup>  $R^2$  is correlation coefficient;<sup>b</sup>  $Q^2$  is cross-validated correlation coefficient;<sup>c</sup>  $S$  is standard error of estimation;<sup>d</sup>  $F$  is Fischer F-ratio.

**Table S.3** The verification for the test set in the SMILES-based models.

| Split  | Run  | $R_0^2$ | $R_0'^2$ | $\frac{(R^2 - R_0^2)}{R^2}$ | $\frac{(R^2 - R_0'^2)}{R^2}$ | $R_m^2$ | $R_m'^2$ | $\overline{R_m}$ | $\Delta R_m$ | $k$    | $k'$   |
|--------|------|---------|----------|-----------------------------|------------------------------|---------|----------|------------------|--------------|--------|--------|
| Split1 | Run1 | 0.8101  | 0.6908   | 0.0195                      | 0.1638                       | 0.7214  | 0.5222   | 0.6218           | 0.1991       | 1.0015 | 0.9957 |
|        | Run2 | 0.8045  | 0.7002   | 0.0114                      | 0.1396                       | 0.7355  | 0.5395   | 0.6375           | 0.1959       | 1.0069 | 0.9903 |
|        | Run3 | 0.8211  | 0.7036   | 0.0240                      | 0.1637                       | 0.7218  | 0.5291   | 0.6255           | 0.1927       | 0.9944 | 1.0030 |
| Split2 | Run1 | 0.7440  | 0.7272   | 0.0131                      | 0.0354                       | 0.6790  | 0.6308   | 0.6549           | 0.0482       | 0.9792 | 1.0174 |
|        | Run2 | 0.6880  | 0.6928   | 0.0365                      | 0.0299                       | 0.5988  | 0.6098   | 0.6043           | 0.0110       | 0.9830 | 1.0127 |
|        | Run3 | 0.7275  | 0.6983   | 0.0113                      | 0.0511                       | 0.6687  | 0.5932   | 0.6310           | 0.0755       | 0.9842 | 1.0121 |
| Split3 | Run1 | 0.7626  | 0.8377   | 0.0994                      | 0.0107                       | 0.6011  | 0.7662   | 0.6836           | 0.1651       | 1.0063 | 0.9909 |
|        | Run2 | 0.7435  | 0.7818   | 0.0505                      | 0.0017                       | 0.6273  | 0.7547   | 0.6910           | 0.1274       | 1.0407 | 0.9579 |
|        | Run3 | 0.7290  | 0.7937   | 0.0821                      | 0.0005                       | 0.5914  | 0.7780   | 0.6847           | 0.1866       | 1.0163 | 0.9807 |
| Split4 | Run1 | 0.6603  | 0.7318   | 0.0988                      | 0.0013                       | 0.5356  | 0.7100   | 0.6228           | 0.1744       | 1.0032 | 0.9928 |
|        | Run2 | 0.6802  | 0.7468   | 0.0899                      | 0.0008                       | 0.5537  | 0.7296   | 0.6417           | 0.1760       | 1.0123 | 0.9841 |
|        | Run3 | 0.6676  | 0.7372   | 0.0954                      | 0.0011                       | 0.5421  | 0.7169   | 0.6295           | 0.1748       | 1.0087 | 0.9874 |

**Table S.4** The parameters of the CoMSIA models after changing the combination of fields.

| Split  | Parameters       | CoMSIA<br>(SEA) | CoMSIA<br>(SEH) | CoMSIA<br>(SED) | CoMSIA<br>(SEAH) | CoMSIA<br>(SEAD) | CoMSIA<br>(SEADH) <sup>f</sup> |
|--------|------------------|-----------------|-----------------|-----------------|------------------|------------------|--------------------------------|
| Split1 | $Q^{2a}$         | 0.651           | 0.488           | 0.623           | 0.565            | 0.591            | 0.521                          |
|        | ONC <sup>b</sup> | 7               | 5               | 7               | 6                | 8                | 7                              |
|        | $R^{2c}$         | 0.937           | 0.923           | 0.939           | 0.935            | 0.941            | 0.940                          |
|        | $S^d$            | 0.173           | 0.185           | 0.170           | 0.173            | 0.171            | 0.169                          |
|        | $F^e$            | 90              | 84              | 73              | 82               | 63               | 73                             |
| Split2 | $Q^2$            | 0.754           | 0.636           | 0.700           | 0.710            | 0.694            | 0.659                          |
|        | ONC              | 7               | 8               | 9               | 9                | 7                | 9                              |
|        | $R^2$            | 0.980           | 0.989           | 0.987           | 0.989            | 0.976            | 0.987                          |
|        | $S$              | 0.098           | 0.074           | 0.082           | 0.074            | 0.107            | 0.080                          |
|        | $F$              | 229             | 351             | 259             | 320              | 191              | 267                            |
| Split3 | $Q^2$            | 0.627           | 0.649           | 0.573           | 0.641            | 0.577            | 0.591                          |
|        | ONC              | 8               | 9               | 9               | 6                | 9                | 10                             |
|        | $R^2$            | 0.935           | 0.963           | 0.944           | 0.930            | 0.940            | 0.959                          |
|        | $S$              | 0.184           | 0.141           | 0.173           | 0.185            | 0.179            | 0.150                          |
|        | $F$              | 59              | 92              | 60              | 77               | 56               | 73                             |

<sup>a</sup> Cross-validated correlation coefficient after the leave-one-out procedure;

<sup>b</sup> Optimum number of components;

<sup>c</sup> Non-cross-validated correlation coefficient;

<sup>d</sup> Standard error of estimate;

<sup>e</sup>  $F$  is Fischer F-ratio;

<sup>f</sup> S, steric; E, electrostatic; H, hydrophobic field; D, hydrogen bond donor; A, hydrogen bond acceptor;
